# Supplementary material for: Effect of L. crispatus M247 Administration on Pregnancy Outcomes in Women Undergoing IVF: A Controlled, Retrospective, Observational, and Open-Label Study
Source: MDPI journal article supplement (doi:10.3390/microorganisms11112796), 2023-11-17
Supplement: s1 [file s1]

# Supplementary File S1

Frequency distribution of the ages of the whole analysed sample.

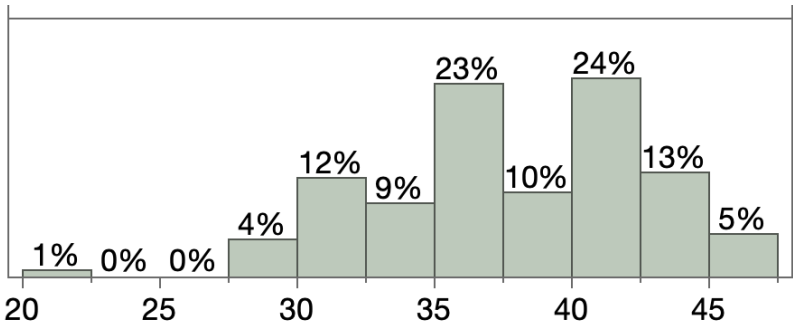

# Supplementary File S2

Legend:

Group = Group

Età = Age

Trattato = Treated

Controllo = Control

| Odds Ratios for Gruppo |           |            |            |           |           |
|------------------------|-----------|------------|------------|-----------|-----------|
| Level1                 | /Level2   | Odds Ratio | Prob>Chisq | Lower 95% | Upper 95% |
| Trattato               | Controllo | 1.561566   | 0.2783     | 0.69764   | 3.4953391 |
| Controllo              | Trattato  | 0.6403828  | 0.2783     | 0.2860953 | 1.4334041 |

| Odds Ratios for Età |         |            |            |           |           |
|---------------------|---------|------------|------------|-----------|-----------|
| Level1              | /Level2 | Odds Ratio | Prob>Chisq | Lower 95% | Upper 95% |
| 30-40               | 20-30   | 3.0907932  | 0.3056     | 0.3569156 | 26.765436 |
| 40-42               | 20-30   | 1.0960184  | 0.9393     | 0.1035975 | 11.59542  |
| 40-42               | 30-40   | 0.3546075  | 0.0784     | 0.1117969 | 1.1247757 |
| 42 e +              | 20-30   | 0.4145543  | 0.4971     | 0.0326429 | 5.2647039 |
| 42 e +              | 30-40   | 0.1341256  | 0.0089*    | 0.0297845 | 0.6039932 |
| 42 e +              | 40-42   | 0.3782367  | 0.2842     | 0.0638158 | 2.2418102 |
| 20-30               | 30-40   | 0.3235415  | 0.3056     | 0.0373616 | 2.8017826 |
| 20-30               | 40-42   | 0.9123934  | 0.9393     | 0.0862409 | 9.6527446 |
| 30-40               | 40-42   | 2.8200194  | 0.0784     | 0.8890662 | 8.9447893 |
| 20-30               | 42 e +  | 2.412229   | 0.4971     | 0.1899442 | 30.634516 |
| 30-40               | 42 e +  | 7.455701   | 0.0089*    | 1.6556477 | 33.574459 |
| 40-42               | 42 e +  | 2.6438474  | 0.2842     | 0.4460681 | 15.670094 |

formal approximations used for ratio

The Odds Ratio for age are intended as Positive vs Negative regardless of treatment

## Supplementary File S3

Contingency Table  
Result for Hormonal therapy

|          | Gonal F | Meriofert | Meropur | Ovaleap | Ovaleap | Meropur | Progynova | Crinone | Progynova | Pleyris | Progynova | Prontogest | Totale |
|----------|---------|-----------|---------|---------|---------|---------|-----------|---------|-----------|---------|-----------|------------|--------|
| Negative | 8       | 2         | 8       | 7       |         | 1       |           | 30      |           | 9       |           | 62         | 127    |
|          | 5       | 1,25      | 5       | 4,38    |         | 0,63    |           | 18,75   |           | 5,63    |           | 38,75      | 79,38  |
|          | 100     | 100       | 100     | 100     |         | 100     |           | 73,17   |           | 64,29   |           | 78,48      |        |
|          | 6,3     | 1,57      | 6,3     | 5,51    |         | 0,79    |           | 23,62   |           | 7,09    |           | 48,82      |        |
| Positive | 0       | 0         | 0       | 0       |         | 0       |           | 11      |           | 5       |           | 17         | 33     |
|          | 0       | 0         | 0       | 0       |         | 0       |           | 6,88    |           | 3,13    |           | 10,63      | 20,63  |
|          | 0       | 0         | 0       | 0       |         | 0       |           | 26,83   |           | 35,71   |           | 21,52      |        |
|          | 0       | 0         | 0       | 0       |         | 0       |           | 33,33   |           | 15,15   |           | 51,52      |        |
| Total %  | 8       | 2         | 8       | 7       |         | 1       |           | 41      |           | 14      |           | 79         | 160    |
|          | 5       | 1,25      | 5       | 4,38    |         | 0,63    |           | 25,63   |           | 8,75    |           | 49,38      | 100    |

### Test

| N       | DF                  | - Log likelihood ratio | R-quadro (U) |
|---------|---------------------|------------------------|--------------|
| 160     | 7                   | 7,3236022              | 0,0319       |
| Test    | Chi-quad Prob>ChiQu |                        |              |
| Pearson | 9,706               | 0,2059                 |              |

The analysis between result (positive pregnancy test) versus hormonal therapy is not significant: ( $\chi^2=9.706$ , con  $p=0.2059$ ).

## Supplementary File S4

(Neg=no pregnant; Pos=pregnant)

### Probiotic Group

#### Cryopreserved oocytes > 40

- 1 Tubaric factor Neg
- 2 Age factor Neg
- 3 Reduced ovary reserve Neg

#### Cryopreserved oocytes < 40

- 1 Failure 1<sup>st</sup>-line Neg
- 2 Failure 1<sup>st</sup>-line Neg
- 3 Tubaric factor Pos

|    |                               |     |
|----|-------------------------------|-----|
| 4  | Polyabortivity                | Neg |
| 5  | Failure 1 <sup>st</sup> -line | Neg |
| 6  | Male factor                   | Neg |
| 7  | Failure 1 <sup>st</sup> -line | Neg |
| 8  | Reduced ovary reserve         | Neg |
| 9  | Male factor                   | Pos |
| 10 | Male factor                   | Pos |

### **D3 > 40**

|    |                       |     |
|----|-----------------------|-----|
| 1  | Failure 1-st line     | Neg |
| 2  | Age factor            | Pos |
| 3  | Tubaric factor        | Neg |
| 4  | Age factor            | Neg |
| 5  | Tubaric + Male factor | Neg |
| 6  | Failure 1-st-line     | Neg |
| 7  | Age factor            | Neg |
| 8  | Age factor            | Neg |
| 9  | Age factor            | Neg |
| 10 | Reduced ovary reserve | Neg |
| 11 | Tubaric factor        | Neg |
| 12 | Idiopathic            | Neg |

### **D3 < 40**

|   |                         |     |
|---|-------------------------|-----|
| 1 | Tubaric + endometriosis | Neg |
| 2 | Tubaric factor          | Neg |
| 3 | Tubaric factor          | Neg |
| 4 | Reduced ovary reserve   | Neg |
| 5 | Reduced ovary reserve   | Neg |

### **D5 > 40**

|   |                |     |
|---|----------------|-----|
| 1 | Age factor     | Neg |
| 2 | Tubaric factor | Pos |

|   |                |     |
|---|----------------|-----|
| 3 | Age factor     | Neg |
| 4 | Tubaric factor | Neg |
| 5 | Tubaric factor | Neg |
| 6 | Age factor     | Neg |
| 7 | Age factor     | Pos |
| 8 | Age factor     | Neg |

#### **D5 < 40**

|    |                               |     |
|----|-------------------------------|-----|
| 1  | Male factor                   | Pos |
| 2  | Failure 1 <sup>st</sup> -line | Neg |
| 3  | Tubaric factor                | Neg |
| 4  | Endometriosis                 | Pos |
| 5  | Failure 1 <sup>st</sup> -line | Neg |
| 6  | Failure 1-st line             | Neg |
| 7  | Male factor                   | Neg |
| 8  | Male factor                   | Pos |
| 9  | Tubaric factor                | Pos |
| 10 | Idiopathic                    | Neg |
| 11 | Idiopathic                    | Neg |
| 12 | Tubaric factor                | Neg |
| 13 | Tubaric factor                | Pos |
| 14 | Endometriosis                 | Pos |
| 15 | Male factor                   | Neg |
| 16 | Male + endometriosis          | Neg |
| 17 | Male factor                   | Neg |
| 18 | Idiopathic                    | Pos |
| 19 | Failure 1-st line             | Neg |
| 20 | Tubaric factor                | Pos |
| 21 | Male factor                   | Neg |
| 22 | Male Factor                   | Pos |
| 23 | Male factor                   | Neg |
| 24 | Male factor                   | Pos |

|    |               |     |
|----|---------------|-----|
| 25 | Tubarc factor | Pos |
| 26 | Idiopathic    | Neg |
| 27 | Tubarc factor | Neg |
| 28 | Idiopathic    | Pos |
| 29 | Idiopathic    | Pos |

#### **FIV > 40**

|   |                       |     |
|---|-----------------------|-----|
| 1 | Reduced ovary reserve | Neg |
| 2 | Age factor            | Neg |
| 3 | Reduced ovary reserve | Neg |
| 4 | Reduced ovary reserve | Neg |
| 5 | Age factor            | Neg |
| 6 | Tubarc factor         | Neg |
| 7 | Reduced ovary reserve | Neg |
| 8 | Age factor            | Neg |

#### **ICSI > 40**

|   |             |     |
|---|-------------|-----|
| 1 | Male factor | Neg |
| 2 | Age factor  | Neg |

#### **ICSI > 40**

|   |                   |     |
|---|-------------------|-----|
| 1 | Failure 1-st line | Neg |
| 2 | Failure 1-st line | Neg |
| 3 | Male factor       | Neg |

#### **Control Group**

##### **Cryopreserved oocytes > 40**

|   |                   |     |
|---|-------------------|-----|
| 1 | Failure 1-st line | Neg |
| 2 | Male factor       | Neg |
| 3 | Age factor        | Neg |

##### **Cryopreserved oocytes < 40**

|   |               |     |
|---|---------------|-----|
| 1 | Tubarc factor | Neg |
|---|---------------|-----|

|    |                               |     |
|----|-------------------------------|-----|
| 2  | Male factor                   | Neg |
| 3  | Male factor                   | Pos |
| 4  | Male factor                   | Neg |
| 5  | Tubaric factor                | Neg |
| 6  | Failure 1 <sup>st</sup> -line | Pos |
| 7  | Male factor                   | Neg |
| 8  | Tubaric factor                | Neg |
| 9  | Male factor                   | Neg |
| 10 | Reduced ovary reserve         | Neg |

### **D3 > 40**

|    |                       |     |
|----|-----------------------|-----|
| 1  | Male factor           | Neg |
| 2  | Age factor            | Neg |
| 3  | Age + male factor     | Neg |
| 4  | Reduced ovary reserve | Pos |
| 5  | Tubaric factor        | Neg |
| 6  | Age factor            | Neg |
| 7  | Age factor            | Neg |
| 8  | Tubaric factor        | Neg |
| 9  | Age + male factor     | Neg |
| 10 | Age factor            | Neg |
| 11 | Age factor            | Neg |
| 12 | Age factor            | Neg |

### **D3 < 40**

|   |                   |     |
|---|-------------------|-----|
| 1 | Tubaric factor    | Pos |
| 2 | Failure 1-st line | Neg |
| 3 | Failure 1-st line | Neg |
| 4 | Failure 1-st line | Neg |
| 5 | Failure 1-st line | Neg |

### **D5 > 40**

|   |                   |     |
|---|-------------------|-----|
| 1 | Age + male factor | Neg |
| 2 | Age + male factor | Neg |
| 3 | Tubaric factor    | Neg |
| 4 | Tubaric factor    | Neg |
| 5 | Age factor        | Neg |
| 6 | Tubaric factor    | Pos |
| 7 | Male factor       | Neg |
| 8 | Failure 1-st line | Neg |

#### **D5 < 40**

|    |                               |     |
|----|-------------------------------|-----|
| 1  | Male factor                   | Neg |
| 2  | Male factor                   | Neg |
| 3  | Failure 1st-line              | Neg |
| 4  | Tubaric factor                | Pos |
| 5  | Failure 1 <sup>st</sup> -line | Neg |
| 6  | Idiopathic                    | Neg |
| 7  | Male factor                   | Pos |
| 8  | Failure 1st-line              | Pos |
| 9  | Male factor                   | Pos |
| 10 | Male factor                   | Neg |
| 11 | Male factor                   | Pos |
| 12 | Tubaric factor                | Neg |
| 13 | Endometriosis                 | Neg |
| 14 | Tubaric factor                | Neg |
| 15 | Tubaric factor                | Neg |
| 16 | Failure 1st-line              | Neg |
| 17 | Male factor                   | Neg |
| 18 | Tubaric factor                | Neg |
| 19 | Tubaric factor                | Neg |
| 20 | Male factor                   | Neg |
| 21 | Tubaric factor                | Neg |
| 22 | Male factor                   | Pos |

|    |                |     |
|----|----------------|-----|
| 23 | Tubaric factor | Neg |
| 24 | Tubaric factor | Neg |
| 25 | Tubaric factor | Neg |
| 26 | Endometriosis  | Pos |
| 27 | Tubaric factor | Neg |
| 28 | Male factor    | Neg |
| 29 | Idiopathic     | Neg |

#### **FIV > 40**

|   |                                 |     |
|---|---------------------------------|-----|
| 1 | Age factor                      | Neg |
| 2 | Age + Reduced ovary reserve     | Neg |
| 3 | Age factor                      | Neg |
| 4 | Age factor                      | Neg |
| 5 | Age factor                      | Neg |
| 6 | Age factor                      | Neg |
| 7 | Tubaric + Reduced ovary reserve | Neg |
| 8 | Age factor                      | Neg |

#### **ICSI > 40**

|   |                       |     |
|---|-----------------------|-----|
| 1 | Age factor            | Neg |
| 2 | Tubaric + male factor | Neg |

#### **ICSI > 40**

|   |                       |     |
|---|-----------------------|-----|
| 1 | Idiopathic            | Neg |
| 2 | Reduced ovary reserve | Neg |
| 3 | Failure 1-st line     | Neg |
